# Supplementary material for: From the Backyard to Our Beds: The Spectrum of Care, Attitudes, Relationship Types, and Welfare in Non-Commercial Chicken Care
Source: MDPI journal article supplement (doi:10.3390/ani14020288), 2024-01-17
Supplement: s1 [file s1]

## Supplementary Materials – Contents

|                                          |    |
|------------------------------------------|----|
| A – Consent form and questionnaire ..... | 2  |
| B – Figures .....                        | 22 |
| C – Tables .....                         | 25 |
| D – Extra discussion .....               | 40 |

# Supplementary Materials A. Consent form and questionnaire

## Information and consent form

### Introduction

This questionnaire is for those who look after chickens in a non-commercial capacity, meaning no funds are generated from the chickens. You must be 18 or older and have the chickens permanently in your care (i.e., not just fostering for short periods).

The questionnaire will take around 20 minutes to complete. The questionnaire forms part of a study that aims to collect much-needed data on the care-taking practices and attitudes towards chickens of non-commercial chicken carers. The research is being conducted by Jenny L. Mace, an ex-commercial chicken carer and remote visiting lecturer with The Centre for Animal Welfare at the University of Winchester, UK.

The questionnaire is split into six sections, each of which focuses on the following:

- 1) Demographic information about your chickens
- 2) Your chicken care-taking practices and experiences
- 3) The relationship you have with your chickens
- 4) Your attitudes towards chickens
- 5) The future of your chicken care
- 6) Demographic information about you

**Please ONLY answer this survey if you look after chickens in a non-commercial capacity (i.e., you do not make any funds from your chickens).**

### Participation and Prize Draw

Participation in this survey is voluntary. Participants are free to opt out at any time during the survey and can do so by navigating away from the page. If you do not provide an email address when invited to do so, you will be unable to withdraw your data after submitting it as it will be unidentifiable. If you do provide your email address, you will be free to withdraw your data up to 24 hours after submission because it is at this point that your data will become anonymized. By supplying an email address, you will also be entered into the prize draw for a £50 voucher redeemable at the British Hen Welfare Trust. The intention is to publish the results of this research in a peer-reviewed academic journal. Participating in this research will help to advance knowledge on the care-taking practices of non-commercial chicken carers and their relationships with their chickens. This is an underexplored area and caring for chickens, including ex-commercial chickens, is a growing phenomenon.

### Data Protection

The data gathered will be anonymous and require no identifying factors such as name or email address, unless the participant volunteers this in the final question. In such instances, the data will be anonymized 24 hours after closing the survey or before the researcher examines any of this particular data. Data collected will be used solely for the purposes of this study and publications resulting from it. Data will be treated in accordance with The Data Protection Act 2018; that is, any names/email addresses will only be used for the purpose of disseminating links to the research and they will be deleted after this has been completed. Names and email addresses will also be stored separately from questionnaire

responses using a University-provided, secure, password-protected site.

### **Ethics**

Ethical approval for this study has been granted by the University of Winchester.

### **Contact**

Please use the following contact details if you require any further information about the project:

Jenny L. Mace, part-time remote lecturer – [jenny.mace@winchester.ac.uk](mailto:jenny.mace@winchester.ac.uk)

If you have any concerns or complaints about this research, please contact the University Chair of Ethics at [ethics@winchester.ac.uk](mailto:ethics@winchester.ac.uk).

Please select the statement below to confirm you have read the information above about the study and you consent to your data being used anonymously in the ways described.

☐ Yes, I understand, agree with, and consent to the information above

### **Section 1: Chicken demographics**

**1. How many separate flocks of chickens are normally in your care? Please include any individual hens who don't live with other chickens as their own flock.**

1

2

3

More than 3

**2. How many chickens (counting all individuals in every flock if applicable) are typically in your care?**

1

2

3-6

7-12

13-20

21-30

31-60

61 or more

**3. Please select the option that best applies to you regarding how you source your chickens:**

a. Most of the chickens in my care come from a hatchery

b. Most of the chickens in my care come from a local breeder

c. I breed and rear most of the chickens in my care myself

d. Most of the chickens in my care are ex-commercial chickens spared from slaughter

e. Most of the chickens in my care are unwanted chickens of neighbours or friends or in animal shelters

f. Other (please state)

Question just for those opting for 3d and 3e: If chickens did not need re-homing/rescuing, do you think you would still keep chickens?

Yes                      No                      Unsure

Questions just for those opting for 19d:

Do you know the farm type from which most of your chickens came?

Organic

Free-range

Barn

Cage (enriched or unenriched)

Not sure

Other (please state)

Do you know what the primary use of your chickens was in the former commercial setting?

For their eggs

For their meat

Both for their meat and eggs

Unsure

How do you acquire your ex-commercial chickens? You can select multiple answers if applicable.

- Through a charity that rehomes former laying hens to prevent them going to slaughter
- Through participation in the Animal Save Movement and truck drivers outside slaughterhouses letting activists keep a few chickens
- Through being at the scene of a road traffic accident involving a truck of chickens and rescuing some
- Other

Question for those opting for 3a-c and 3e-f: Would you ever consider re-homing ex-commercial chickens?

Yes                      No

Please explain your answer.

Question for those opting for 3a-d and 3f: Would you ever consider re-homing unwanted chickens (e.g. from a neighbour or in an animal shelter)?

Yes                      No

Please explain your answer.

#### **4. Which of these options best applies to you?**

- a. I primarily care for hens
- b. I primarily care for roosters/cocks
- c. I care for both hens and roosters/cocks

Question for those selecting 4a: What is the reason you primarily care for hens and not roosters/cocks? You can select multiple answers if applicable.

*They are too noisy for me*

*They are too noisy for my neighbours*

*It is not technically allowed to keep roosters/cocks in my area*

*I don't know enough about caring for roosters/cocks*

*I don't have space for a separate flock of roosters/cocks*

*I don't like roosters/cocks as much as hens*

*I find roosters/cocks too aggressive*

*I keep chickens for their eggs, so do not want a rooster/cock as I am not breeding chickens*

*Other*

Question for those selecting 4b: What is the reason you primarily care for roosters/cocks and not hens? You can select multiple answers if applicable.

*I prefer roosters/cocks to hens*

*I am horrified by the way roosters/cocks are treated commercially*

*The secluded environment I live in affords me the ability to care for them without disturbing neighbours*

*Roosters/cocks are more unwanted, neglected and abused in society than hens*

*Other*

Question for those selecting 4c: Do you keep your hens and roosters/cocks together or in separate flocks?

*Together*

*In separate flocks*

*Some together and some in separate flocks*

*If applicable, respondents are also asked: How many roosters/cocks do you keep with your hens? (1, 2, 3, 4, or more).*

## **5. What breed or type are the majority of your chickens?**

Hybrid/ISA Brown

Cornish cross

Leghorn

Light Sussex

Black Rock

Maran

Rhode Island Red

Bantam

Brahma

Orpington

Plymouth Rock

Ameraucana / Araucana / Easter Egger

Unsure

Other (please state)

## Section 2: Chicken care-taking practices and experiences

**6. What was the primary motivation for you to care for chickens? You can select multiple answers if applicable.**

To source eggs in a higher welfare/more ethical capacity

To source chicken meat in a higher welfare/more ethical capacity

To educate children about food

To educate children about animals

To entertain children

To prevent commercial chickens going to slaughter

Self-sufficient food production at home

As a form of therapy

Covid-inspired

Other

**7. Are you the primary caregiver for your chickens?**

Yes

No

50:50 with another adult

My children do all the care-giving and I oversee it

Other

**8. Do you vaccinate your chickens?**

Yes    No    The farm/previous owners do so

**9. Do you name your chickens?**

Yes    No    Some

**10. What is the typical age of your chickens when they come into your care? If the age varies, please select the most typical age.**

I hatch them

As chicks (less than six months of age)

At sexual maturity

At around 18 months old or similar when farms would otherwise send their laying hens to slaughter

Two or older

**11. Which of the following options best describes the kind of setup you have regarding how you keep your chickens? NB: For the purposes of this questionnaire, 'coop' refers to an indoor henhouse where chickens often sleep and 'run' refers to an outside enclosed area in which chickens can move around.**

No coop or run: completely free-range

Just coop for overnight and completely free range during the day

Coop and run with free-range access a lot of the time  
Coop and run with only supervised free-range access  
Coop and run: no free-range allowed  
My chicken(s) lives predominantly indoors in my home  
Other

Questions for those selecting a coop:

*What bedding do you normally use in the coop (i.e., the enclosed area where the chickens sleep)?*

*Straw / chopped straw*  
*Hay*  
*Aubiose (hemp shavings)*  
*Wood shavings*  
*Soft woodchip*  
*Hard woodchip*  
*Shredded paper*  
*No bedding*  
*Other (please state)*

*What is the material of your coop (i.e., the enclosed area where the chickens sleep)?*

*Wood                  Plastic                  Metal                  Other*

*How often do you remove faeces from your coop (i.e. the enclosed area where the chickens sleep)?*

*Daily*  
*Every few days*  
*Weekly*  
*Never*  
*Never – I use the deep litter method*  
*Other*

Questions for those selecting a run:

*What substrate do you normally use in the run (i.e., the enclosed area in which chickens can move around in the open air)?*

*None - bare earth*  
*Soil/compost*  
*Grass*  
*Straw*  
*Hay*  
*Hard woodchip*  
*Soft woodchip*  
*Rubber chipping*  
*Other*

*Do you remove faeces that you can see from the run daily (i.e., the enclosed area in which chickens can move around in the open air)?*

Yes      No

*What is the approximate size of your run (i.e., the enclosed area in which chickens can move around in the open air)?*

*Less than 2m x 2m*

*Between 2m x 2m and under 4m x 4m*

*Between 4m x 4m and under 6m x 6m*

*Between 6m x 6m and under 8m x 8m*

*More than 8m x 8m*

*Other*

*Question for those selecting coop and/or run:*

*Do you use an automatic door?*

Yes      No

*Question for those selecting 'no free-ranging time at all':* *What is the reason you do not allow free-range access at all? You can select multiple answers if applicable.*

*To prevent the chickens from damaging the rest of my garden*

*I am too scared of predators and insufficient time/inclination to supervise the chickens if they were to free-range*

*I don't wish to get the chickens used to having free-range access, otherwise they may want it all the time*

*Other*

**12. Did you follow the legal requirements regarding keeping chickens inside/out of access to wild birds during the last avian flu 'chicken lockdown' in your area?**

Yes

No

Partially

There has not been an avian flu 'chicken lockdown' in my area

Other

*For those selecting Yes/Partially:* *Were you concerned the about your chickens' welfare during the lockdown?*

Yes      No

**13. What measures have you taken to minimise predation risk to your chickens?**

**You can select multiple answers if applicable.**

- Only allowing supervised free-ranging time
- Placing the coop and run very close to the backdoors of our house
- Spending most of the day in a room where I can directly see my chickens



- Choosing galvanised hardware cloth/wire mesh rather than chicken wire for the run material
- Using electric fencing
- Having overhead netting/roof to their run
- Extending the sides of the run/mesh down into the earth by at least 30cm around the entire perimeter of the run
- Using 'skirting' around the entire perimeter of the run that extends out along the ground and is fixed to the ground
- Keeping chickens in a secure coop overnight
- Keeping chickens in a secure coop within a secure run overnight
- Covering the coop air vents with wire gauze
- Conducting regular checks of the integrity of the run/coop security
- Installing a webcam in the coop/enclosure
- The chickens sleep in my house at night
- None
- Other

**14. What do you consider to be the lowest temperature that chickens can cope well with?**

Below -10°C / 14°F

-10°C / 14°F

-5°C / 23°F

0°C / 32°F

5°C / 41°F

**15. Please select all health conditions that any of your chickens has experienced within the last year.**

No health problems in the last 12 months

Red mite

Feather lice

Worms

Marek's disease

Coccidiosis

Newcastle disease

Infectious bronchitis

Diarrhoea

Egg-binding

Egg yolk peritonitis

Respiratory problems (e.g. nasal or eye discharge, coughing, sneezing)

Neurological problems (e.g. weakness or co-ordination difficulties)

Weight loss

Lameness

Injuries

Foot pad dermatitis / bumblefoot

Scaly leg  
Unknown health conditions  
Other

**16. Are you aware of any abnormal behaviour exhibited by any of your chickens (e.g. very persistently aggressive behaviour, persistent feather pecking or pacing)?**

Yes (please describe)                      No

**17. Which of the following options most accurately reflects the typical weight of your chickens?**

Most of my chickens weigh around 1.5kg  
Most of my chickens weigh around 2kg  
Most of my chickens weigh around 2.5kg  
Most of my chickens weigh around 3kg  
I do not know the weight of my chickens  
Other

**18. Do you find that your chickens' hind feathers are regularly soiled to such an extent that it is hard to manage?**

Yes                      Sometimes                      No

**19. How many of your chickens have died in the last year?**

0              1              2              3              4              5              6              7+

**20. On average, what age have your chickens lived to thus far?**

Less than 3 years of age  
3-5 years of age  
6-8 years of age  
9-11 years of age  
A mix of these  
Too early to tell  
Other

**21. What was the age of your chicken who has lived the longest thus far?**

<3  
3  
4  
5  
6  
7  
8  
9  
10  
11+

**22. What have been the causes of death in your chickens (either with or without the aid of euthanasia)? You can select multiple answers if applicable.**

Egg yolk peritonitis  
Egg binding  
Ovarian cancer/tumour  
Another form of cancer/tumour  
Crop disorder  
Marek's disease  
Newcastle disease  
Coccidiosis  
Respiratory disease  
Predation by other animals  
Predation by humans (me/family member) for food  
Re-occurring prolapse  
Heart failure  
Theft (with belief that they will be killed or used in a blood sport)  
Aggression from another chicken  
Sudden death  
Unknown cause  
Other

**23. Do you, or would you ever, kill your chickens for human consumption?**

Yes    No    Yes, but I would ask a friend or other family member to do the killing for me

Question for those selecting 'yes': What method do/would you use to kill your chickens?

*Neck wringing (i.e. cervical dislocation)*  
*Killing cone/other method involving the cutting of neck veins or arteries*  
*Decapitation*  
*A mix of the above*  
*Other*

Question for those selecting 'no': How do you usually tend to your chickens' bodies when they die? If you have not experienced the death of any of your chickens yet, please imagine what you might do.

*Bury on premises*  
*Place in rubbish bin*  
*Outsource cremation services*  
*Cremate/burn at home*  
*Other*

**24. Do you memorialise your chickens when they die (e.g., by having symbols or places of remembrance)?**

Yes                      No                      Sometimes

**25. Do you take your chickens to a vet when they are ill?**

- a. Yes, a standard non-exotics vet
- b. Yes, an exotics vet
- c. I mostly treat ill chickens at home using herbal/alternative remedies
- d. I don't seek any treatment for ill chickens

Extra questions for those selecting 25a:

*Which of the following options best describes your reasoning for not choosing an exotic vet? You can select multiple answers if applicable.*

*I do not know of one*

*My nearest exotic vet is too far away*

*Exotic vets are too expensive*

*There is an experienced avian vet at my standard vets / my vet practice is considered 'chicken-friendly'*

*Not sure what an exotic vet is*

*Other*

Extra question for those selecting 25a/b:

*Are you happy with the service your chickens receive at the vets?*

*Yes*

*No*

*Unsure*

*If not, why not?*

Extra questions for 25b:

*Which option best describes how long it takes you to reach your exotic vet (one way)?*

*Less than 15 minutes*

*Between 15 and under 30 minutes*

*Between 30 minutes and under 60 minutes*

*Between 1 and under 1.5 hours*

*Between 1.5 hours and under 2 hours*

*2 or more hours*

Extra questions for 25c:

*Have you had success in treating some health problems at home? (Yes/No/Partially)*

*What is your reasoning for treating chickens at home? You can select multiple answers if applicable.*

*Vets are too expensive*

*I believe in herbal remedies / other alternative health treatments*

*I fear vets will not know how to treat my chicken and will just suggest euthanasia*

*Other*

**26. Which of the following terms do you use to describe your chicken caring role?**

Chicken rescuer  
Chicken carer  
Chicken keeper  
Backyard farmer  
Other (please state)

**27. What chicken care resource do you most frequently use?**

Webinars by specialists (please state an example)  
Talking with other chicken carers  
My vet  
Forums or online groups (please state an example)  
Other (please state)  
None

**28. Have you ever cared for a chicken who primarily lived indoors in your personal home?**

a. Yes / b. No

*Extra questions for those selecting 28a:*

*Please describe what motivated this step.*

*Extra questions for those selecting 28b:*

*Would you ever consider caring for a chicken who lives primarily in your home? (Yes/No)*

*If not, please explain why.*

**29. Have you heard of the Suprelorin hormonal implant that can be used in hens?**

a. Yes / b. No

*Extra questions for those selecting 29a:*

*Do you think the Suprelorin hormonal implant can improve the LENGTH of a hen's life?  
(Yes/No/Unsure)*

*Do you think the Suprelorin hormonal implant can improve the QUALITY of a hen's life?  
(Yes/No/Unsure)*

*Do you use the Suprelorin hormonal implant regularly with your hens?*

- Yes, for all egg-laying breeds in my care in a preventative capacity (i.e. my hens are routinely implanted to try and prevent health problems arising)
- Yes, for all egg-laying breeds in my care in a treatment capacity (i.e. my hens are only implanted if health problems connected to egg-laying arise)
- No

- Other
- Not applicable - I only care for roosters/ cocks

*Do you have any concerns about the Suprelorin hormonal implant? Please explain.*

Extra questions for those selecting 29b:

*The Suprelorin hormonal implant is often recommended by exotic vets to prolong the duration and quality of life for laying hens, who are susceptible to reproductive illnesses due to the number of eggs they have been engineered to breed—around 300 per year vs around 12 per year in their ancestors. The implant works by preventing the release of the hormone responsible for triggering egg production. Its cost will vary according to the region you live in and size of the implant. However, a rough figure is US\$140 (£100 or €116) for the large size, which will need to be re-administered approximately every 10 months. It can cause some initial side effects (e.g., chickens becoming more subdued and a considerable moult); the side effects are thought to generally wear off after a couple of weeks. Hens may also be calmer overall on implants. Considering this information, would you ever consider using this hormonal implant on your hens?*

Yes

Yes, but only if it was more affordable

No

Unsure

N/a (if only keep roosters).

**30. If you have a hen in your care who stops laying eggs, which of the following applies?**

I rehome her

I kill her/have her killed

I continue to look after her

I never have any hens in my care

All my hens are hormonally implanted, so they do not lay eggs

**31. Do you have experience of caring for any chickens with special needs or who are disabled (e.g. a blind chicken)?**

Yes (please share an example or two)

No

For those selecting 'no': Do you think you would be willing to care for a chicken who has special needs or is disabled (e.g., a blind chicken)? Please explain your answer.

**32. Do your chickens have a full plumage?**

Yes, mostly

Sometimes

Rarely/never

**33. Do you have arrangements in place for the care of your chickens in the event of your unexpected death (e.g. the care of your chickens is discussed in your will or you have spoken to a charity or family members about it)?**

Yes

Partially

No

**34. Please tick the box that most closely reflects how much you agree or disagree with the following statements related to your chicken care-taking practices.**

| <i>Statement</i>                                                                                                        | <i>Never</i> | <i>Rarely</i> | <i>Sometimes</i> | <i>Often</i> | <i>Always</i> |
|-------------------------------------------------------------------------------------------------------------------------|--------------|---------------|------------------|--------------|---------------|
| I worry about my chickens' health and wellbeing                                                                         |              |               |                  |              |               |
| I find caring for chickens easy                                                                                         |              |               |                  |              |               |
| I find caring for chickens stressful                                                                                    |              |               |                  |              |               |
| I prefer natural deaths at home for chickens over euthanasia                                                            |              |               |                  |              |               |
| I conduct periodical health checks of my chickens                                                                       |              |               |                  |              |               |
| I ensure my chickens have fresh material for dustbathing in                                                             |              |               |                  |              |               |
| I have a post-mortem carried out to determine the cause of death if the cause of death of one of my chickens is unknown |              |               |                  |              |               |
| I deworm the chickens OR send off faecal samples for testing at the respective recommended time intervals               |              |               |                  |              |               |
| I let my chickens inside my house if they wish to come in                                                               |              |               |                  |              |               |
| I let my chickens rest for long periods inside the house if they wish to                                                |              |               |                  |              |               |
| I take my chickens on trips (e.g., to the beach or a woodland)                                                          |              |               |                  |              |               |
| I spend time observing my chickens' behaviour                                                                           |              |               |                  |              |               |
| I use a chicken diaper on my chickens                                                                                   |              |               |                  |              |               |
| I arrange for someone to care for my chickens when I am away for a weekend                                              |              |               |                  |              |               |
| I use a chicken sweater on my chickens                                                                                  |              |               |                  |              |               |
| I try to improve my knowledge of optimal care-taking practices for chickens                                             |              |               |                  |              |               |
| I feed any eggs my chickens lay back to them                                                                            |              |               |                  |              |               |
| I use a chicken leash                                                                                                   |              |               |                  |              |               |
| I introduce new chickens to a flock gradually over a period of a few weeks                                              |              |               |                  |              |               |
| I clean my chickens' hind feathers if they become very soiled                                                           |              |               |                  |              |               |

|                                                                                                                                        |  |  |  |  |  |
|----------------------------------------------------------------------------------------------------------------------------------------|--|--|--|--|--|
| I include a probiotic supplement in my chickens water/feed                                                                             |  |  |  |  |  |
| I include a calcium supplement in my chickens water/feed                                                                               |  |  |  |  |  |
| Regardless of the cost, if there is a treatment that could help my chicken, then I pay for it or fundraise for it if I can't afford it |  |  |  |  |  |
| I find caring for chickens harder than I thought I would                                                                               |  |  |  |  |  |
| I am confident in providing excellent care for my chickens                                                                             |  |  |  |  |  |

**35. Can you think of any novel/niche chicken care-taking practices that you think warrant more attention and support? Please explain.**



### Section 3: Your relationship with your chicken(s)

**36. Please tick the box that most closely reflects how much you agree or disagree with the following statements that are related to the relationship you have with your chicken (bird). Please consider the same chicken throughout this question, namely the one you are closest to.**

| <i>Statement</i>                                                    | <i>Strongly disagree</i> | <i>Disagree</i> | <i>Undecided</i> | <i>Agree</i> | <i>Strongly agree</i> |
|---------------------------------------------------------------------|--------------------------|-----------------|------------------|--------------|-----------------------|
| I enjoy playing with my bird                                        |                          |                 |                  |              |                       |
| I think my bird understands me                                      |                          |                 |                  |              |                       |
| My bird knows when I'm feeling bad                                  |                          |                 |                  |              |                       |
| I consider my bird to be a friend                                   |                          |                 |                  |              |                       |
| My bird is an equal member of my family                             |                          |                 |                  |              |                       |
| Sometimes I wonder what my bird is thinking                         |                          |                 |                  |              |                       |
| I can talk to my bird about anything                                |                          |                 |                  |              |                       |
| My bird is like a child to me                                       |                          |                 |                  |              |                       |
| My bird provides structure for my life                              |                          |                 |                  |              |                       |
| Having a bird gives me something to care for                        |                          |                 |                  |              |                       |
| My bird makes me feel needed                                        |                          |                 |                  |              |                       |
| Spending time with my bird makes me forget my problems for a while  |                          |                 |                  |              |                       |
| I feel relaxed / more content because of my bird                    |                          |                 |                  |              |                       |
| I feel distressed when my bird is ill and I see [my bird] suffering |                          |                 |                  |              |                       |
| When my bird is ill, it is my duty to care for [him/her]            |                          |                 |                  |              |                       |
| I pay attention to my bird's body language                          |                          |                 |                  |              |                       |
| My bird has [his/her] own unique personality                        |                          |                 |                  |              |                       |
| My bird is a sensitive being with his/her own needs                 |                          |                 |                  |              |                       |
| My bird actively tries to be close to me                            |                          |                 |                  |              |                       |
| My bird always keeps a little distance from me                      |                          |                 |                  |              |                       |
| My bird ignores me                                                  |                          |                 |                  |              |                       |

#### Section 4: Your attitudes towards chickens

**37. Please tick the box that most closely reflects how much you agree or disagree with the following statements that are related to your attitudes towards chickens.**

| <i>Statement</i>                                                                                             | <i>Strongly disagree</i> | <i>Disagree</i> | <i>Undecided</i> | <i>Agree</i> | <i>Strongly agree</i> |
|--------------------------------------------------------------------------------------------------------------|--------------------------|-----------------|------------------|--------------|-----------------------|
| It is morally wrong to participate in cockfighting in anyway                                                 |                          |                 |                  |              |                       |
| It is morally acceptable to keep chickens for their eggs                                                     |                          |                 |                  |              |                       |
| I think it is perfectly acceptable for chickens to be raised for human consumption                           |                          |                 |                  |              |                       |
| Basically, humans have the right to use chickens as we see fit                                               |                          |                 |                  |              |                       |
| The slaughter of chickens should be immediately stopped even if it means some people will be put out of work |                          |                 |                  |              |                       |
| I sometimes get upset when I see chickens in cages                                                           |                          |                 |                  |              |                       |
| Breeding chickens for optimal egg production is morally acceptable                                           |                          |                 |                  |              |                       |
| Sometimes it is necessary to clip chickens' wings to prevent them jumping/flying too high                    |                          |                 |                  |              |                       |
| It is morally wrong to breed chickens when millions of male chickens are unwanted and killed                 |                          |                 |                  |              |                       |
| Chickens are morally less important than dogs                                                                |                          |                 |                  |              |                       |
| Chickens experience a wide variety of emotions                                                               |                          |                 |                  |              |                       |
| Chickens are unintelligent                                                                                   |                          |                 |                  |              |                       |

## Section 5: The future

**38. Do you see yourself still caring for chickens in 10 years' time?**

Yes                      No                      Unsure

Please explain your answer.

**39. How do you think the welfare of your chickens could be further optimised?**

**40. What better support do you think could be available to help you to care optimally for your chickens?**

**41. Is there anything else that you would like to share in relation to caring for your chickens?**

**42. Please enter your email address below if you would like to receive further information about this study and to be entered into the prize draw.**

## Section 6: Human demographics

**43. Please confirm that you care for chickens in a non-commercial capacity (i.e., you do not make any money from them).**

I care for chickens in a non-commercial capacity

I do not care for chickens in a non-commercial capacity

**44. Please select your age group.**

18-24    25-34    35-44    45-54    55-64    65-74    75+

**45. Which of the following best describes the highest education level you have completed?**

Lower secondary/high school

Upper secondary school/Sixth Form

Some higher education but not to degree level

Undergraduate degree

Master's degree

PhD

**46. Please select the gender you identify most with:**

Male

Female

Non-binary

Rather not say

**47. What is your ethnicity?**

**48. What country do you live in most of the time?**

USA

Canada

Australia

New Zealand

UK

An EU country

Another European country (please state)

Other (please state)

**49. Which of these options best describes your living environment?**

Rural

Semi-rural

Suburban

Urban

**50. Which of these options best describes your home?**

Terraced house

Semi-detached house

Detached house

Other (please state)

**51. Which of these applies to you?**

I rent my home / I own my home

**52. How would you describe the size of your garden/land?**

Small

Medium

Large

Very large

**53. Which of the following best describes your occupation?**

Professional

Clerical

Sales

Service

Labour (other than agriculture)

Agriculture

Student

Retired

Unemployed

Other

**54. What is your household profile?**

Single-person household

Multi-adult household (e.g., roommates or friends)

Married/living with partner with no children (do not have any)

Married/living with partner with no children (they live elsewhere/are grown-up)

Married/living with partner with children

Other

**55. Which option do you think best describes your general diet?**

- Standard omnivore (I eat animal products as part of most meals)
- Conscientious omnivore (I only purchase animal products from local and high-welfare sources)
- The only animal product I do NOT consume is chicken meat
- Reductarian (I am reducing my consumption of animal products)
- Pescatarian (I do not eat meat, but I do eat fish and/or seafood)
- Pollotarian (I do not eat red meat, but I do eat white meat)
- Vegetarian (I do not eat meat, fish, or seafood, but I consume dairy and eggs or products containing these)

- The *only* animal products I consume are eggs from my hens
- Plant-based/vegan (I avoid consuming all animal products and aim for a 100% plant-based diet)
- Other (please state)

**56. Are you responsible for the care of other animals in addition to chickens? You can select multiple answers if applicable.?**

- No
- Yes, dog(s)
- Yes, cat(s)
- Yes, other (typically) outdoor birds such as ducks or turkeys
- Yes, other small animals such as guinea pigs, rabbits or hamsters
- Yes, other indoor birds such as parrots or budgies
- Yes, fish
- Yes, other exotic pets such as snakes, tortoises, tarantulas or lizards
- Yes, large animals such as horses, cows, pigs, sheep or goats
- Yes, another type of animal (please state)

**57. How long have you been caring for chickens?**

Less than 1 year

Between 1 year and under 3 years

Between 3 years and under 5 years

Between 5 years and under 7 years

Between 7 years and under 9 years

Between 9 years and under 11 years

More than 11 years

Many thanks indeed for taking the time to complete this questionnaire.

## Supplementary Materials B. Supplementary figures

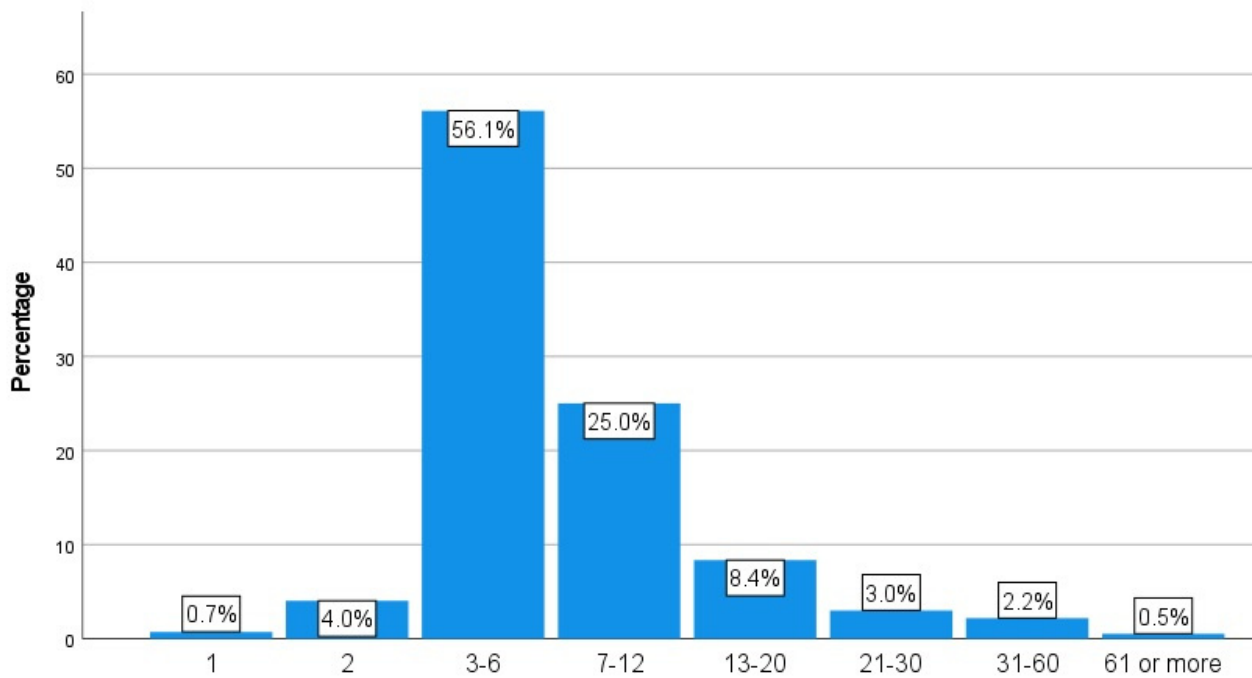

Figure S1. The number of chickens in respondents' care (n=2,058).

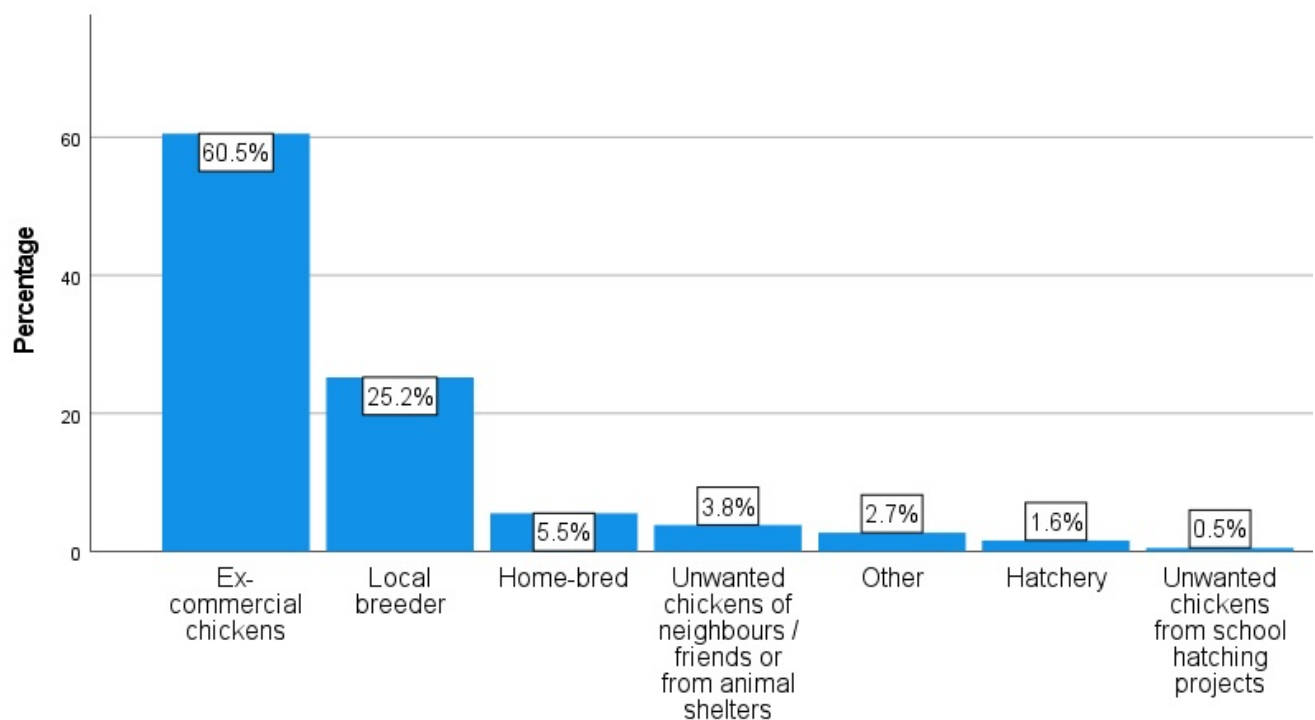

Figure S2. The origin of the majority of chickens in respondents' care (n=2,057).

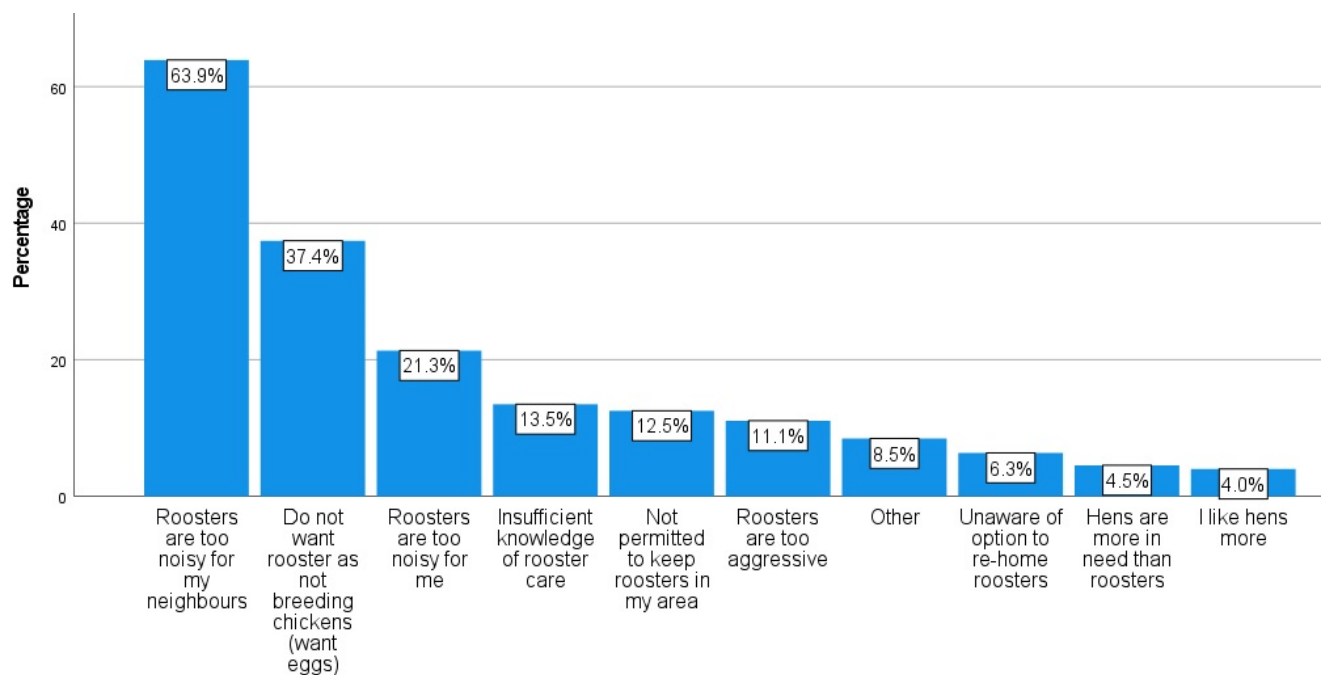

Figure S3. Respondents' reasons for caring solely for hens, and not roosters/ cocks. Note: Each answer choice was treated as its own independent dichotomous question ("yes"=reason was applicable; "no"=reason was not applicable); the percentages shown represent the percentage of respondents choosing "yes" for each answer choice. Respondents could select multiple answer choices, meaning the total number of respondents is not stated. This question was just for those who stated they did not care for any roosters.

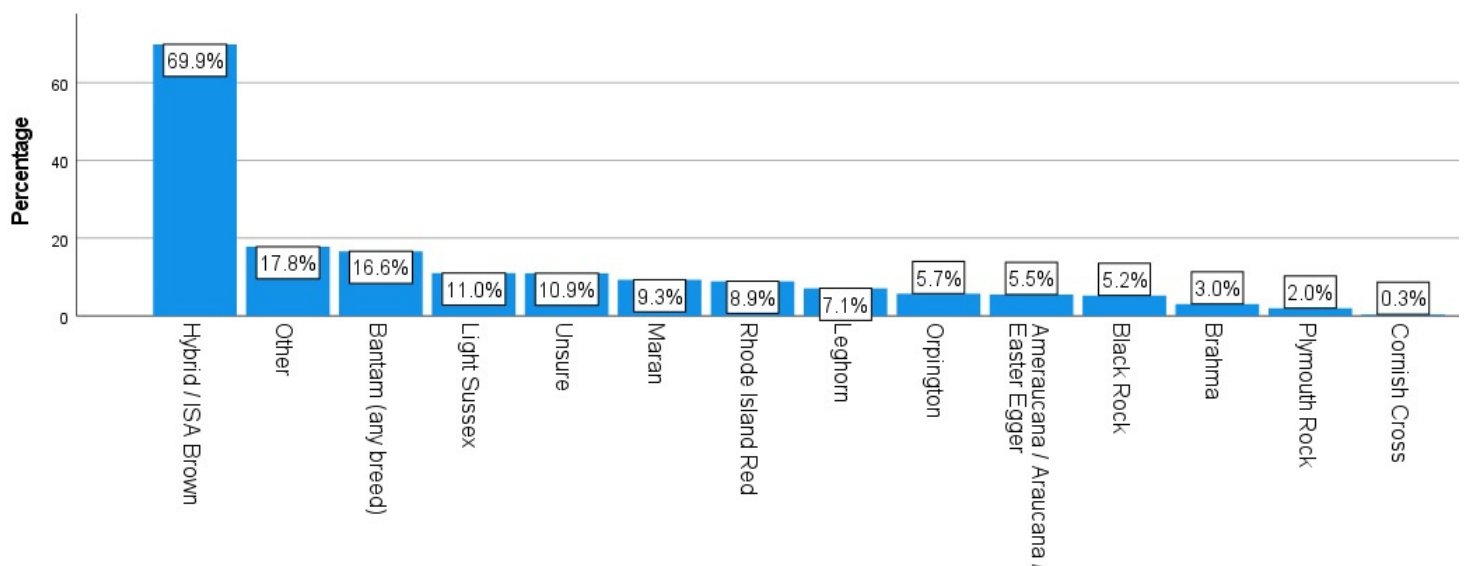

Figure S4. The most common breed/type of chicken cared for by respondents. Note: Each answer choice was treated as its own independent dichotomous question ("yes"=breed/type was owned; "no"=breed/type was not owned); the percentages shown represent the percentage of respondents choosing "yes" for each answer choice. Respondents could select multiple answer choices, meaning the total number of respondents is not stated. Examples of "other" breeds included Nero, Bluebell, Australorp, Silkie, Welsummer, and Wyandotte.

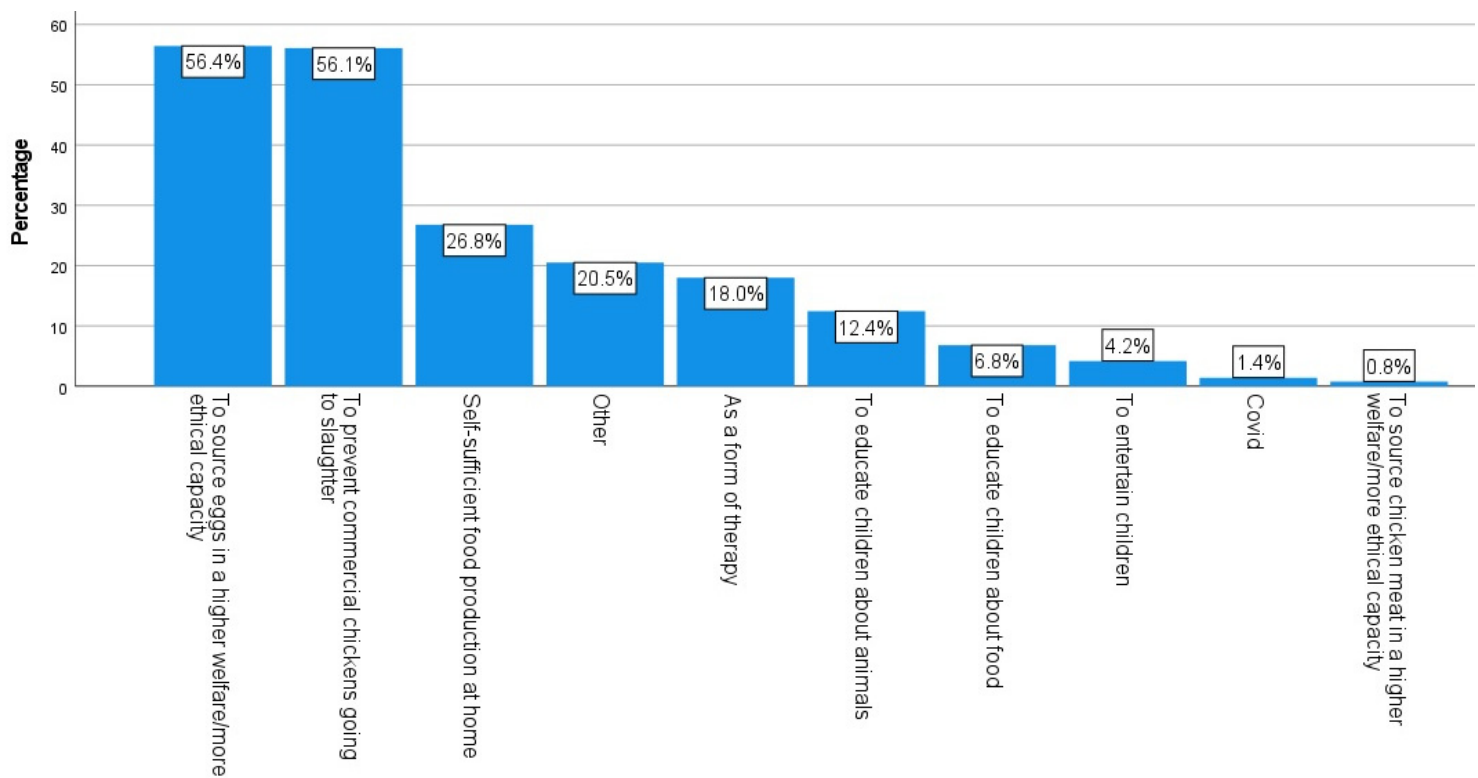

Figure S5. The primary motivations of respondents for caring for chickens.

Note: Each answer choice was treated as its own independent dichotomous question (“yes”=motive was applicable; “no”=motive was not applicable); the percentages shown represent the percentage of respondents choosing “yes” for each answer choice. Respondents could select multiple answer choices, meaning the total number of respondents is not stated. The main “other” motivation was for pets, as companion animals, and for enjoyment.

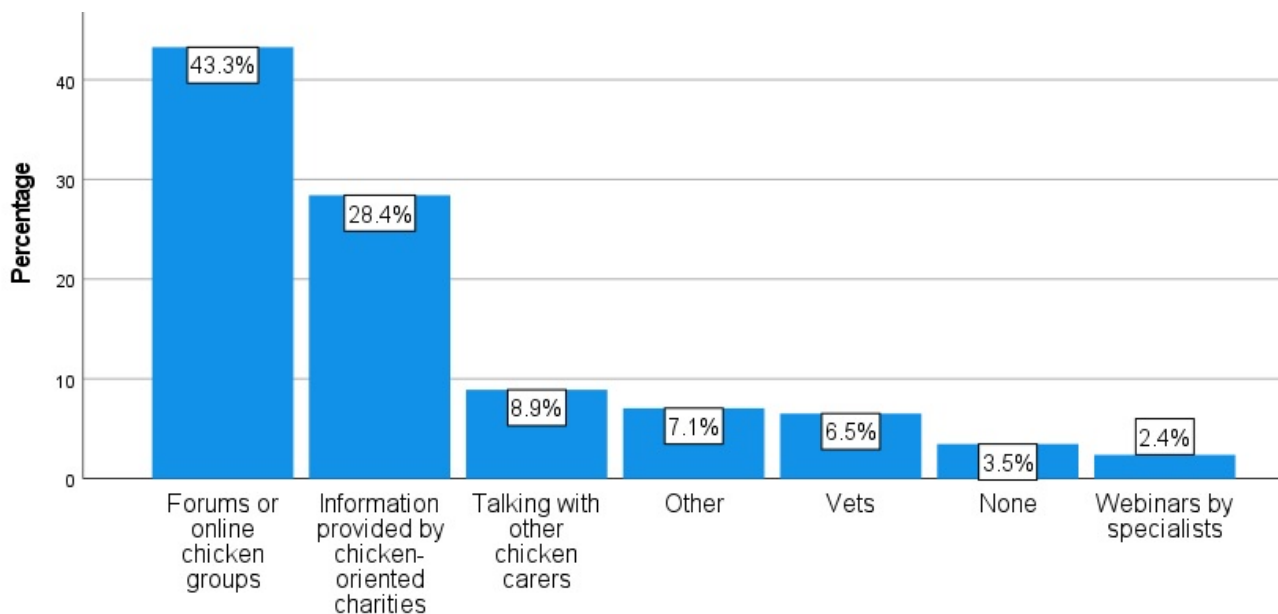

Figure S6. The care resource most commonly used by respondents (n=2,055).



## Supplementary Materials C. Supplementary tables

Table S1. Additional care-taking practices.

|                                                                | Never | Rarely | Some times | Often | Always |
|----------------------------------------------------------------|-------|--------|------------|-------|--------|
| I worry about my chickens' health and wellbeing                | 1.3%  | 10.5%  | 45.9%      | 25.5% | 16.9%  |
| I find caring for chickens easy                                | 0.3%  | 1.3%   | 14.0%      | 54.5% | 29.9%  |
| I find caring for chickens stressful                           | 29.2% | 41.7%  | 25.6%      | 2.8%  | 0.6%   |
| I take my chickens on trips (e.g., to the beach or a woodland) | 94.5% | 3.3%   | 1.2%       | 0.7%  | 0.3%   |
| I use a chicken diaper on my chickens                          | 97.5% | 1.4%   | 0.8%       | 0.2%  | 0.1%   |
| I use a chicken sweater on my chickens                         | 91.6% | 4.6%   | 2.9%       | 0.6%  | 0.3%   |
| I use a chicken leash                                          | 98.3% | 1.0%   | 0.2%       | 0.0%  | 0.4%   |
| I include a calcium supplement in my chickens water/feed       | 22.7% | 9.2%   | 26.9%      | 20.9% | 20.3%  |
| I find caring for chickens harder than I thought I would       | 44.3% | 24.7%  | 19.9%      | 7.0%  | 4.1%   |
| I am confident that I provide excellent care for my chickens   | 1.1%  | 1.6%   | 7.8%       | 41.2% | 48.4%  |

Table S2. Full chi-squared test of association results.

Note: Full results of the chi-squared tests of association between care-taking variables and demographic variables. Any significance highlighted by the chi-squared tests are highlighted in bold with the Cramer's V strength of association value added (0 = no association; 0.1-0.2, weak association; 0.3 = moderate association; over 0.3 = strong association, as per the Methods section). Cramer's V values 0.2+ are in red. In instances where cell counts were <20% in five+ cases, the likelihood ratio test was used in lieu of the chi-squared test; such cases are highlighted in grey.

| Carer type/<br>style    | Demographic variables |              |              |              |              |                   |              |                 |              |              |              |
|-------------------------|-----------------------|--------------|--------------|--------------|--------------|-------------------|--------------|-----------------|--------------|--------------|--------------|
|                         | Human age             | Gender       | Country      | Home type    | Occupation   | Household profile | Living env   | Education level | Diet         | Diet group   | Role name    |
| Source most             | 0.028, .065           | 0.494        | <0.001, .203 | 0.09         | 0.003, .099  | 0.007, .072       | <0.001, .093 | 0.238           | <0.001, .117 | <0.001, .109 | <0.001, .214 |
| Hens, cocks, both       | 0.840                 | 0.140        | <0.001, .272 | <0.001, .109 | 0.032, .109  | 0.624             | <0.001, .157 | 0.224           | 0.440        | 0.118        | 0.01, .08    |
| Name chickens?          | <0.001, .184          | <0.001, .107 | 0.011, .073  | <0.001, .082 | <0.001, .153 | <0.001, .143      | <0.001, .122 | 0.054           | 0.001, .100  | <0.001, .075 | <0.001, .109 |
| Setup                   | <0.001, .086          | 0.314        | 0.165        | 0.055        | 0.015, .101  | 0.004, .074       | <0.001, .135 | 0.03, .071      | 0.06         | 0.063        | 0.131        |
| Coop material           | <0.001, .108          | 0.207        | 0.006, .087  | 0.010, .071  | <0.001, .104 | 0.010, .076       | <0.001, .101 | 0.301           | 0.067        | 0.128        | 0.102        |
| Memorialize?            | <0.001, .199          | 0.057        | 0.003, .095  | <0.001, .092 | <0.001, .157 | <0.001, .147      | 0.005, .069  | 0.687           | <0.001, .190 | <0.001, .139 | <0.001, .155 |
| Take to vets?           | <0.001, .120          | <0.001, .076 | <0.001, .105 | 0.885        | <0.001, .111 | <0.001, .086      | <0.001, .077 | 0.014, .070     | <0.001, .127 | <0.001, .092 | <0.001, .125 |
| Home treatment success? | 0.014, .146           | 0.800        | 0.198        | 0.280        | 0.060        | 0.57              | 0.415        | 0.306           | 0.923        | 0.896        | 0.280        |

|                                 |              |              |              |              |              |              |              |              |              |              |              |
|---------------------------------|--------------|--------------|--------------|--------------|--------------|--------------|--------------|--------------|--------------|--------------|--------------|
| Happy with vets?                | 0.252        | 0.445        | 0.059        | <0.001, .106 | 0.602        | 0.688        | 0.297        | 0.011, .095  | 0.067        | 0.266        | 0.351        |
| Consider implant?               | <0.001, .135 | 0.134        | 0.187        | 0.016, .078  | <0.001, .135 | 0.003, .091  | 0.049, .064  | 0.707        | 0.002, .121  | <0.001, .094 | <0.001, .111 |
| Implants improve lifespan       | 0.083        | .179         | 0.363        | 0.047, .106  | 0.296        | .237         | 0.029, .103  | 0.7          | <0.001, .193 | 0.001, .127  | 0.202        |
| Implants improve life quality   | 0.014, .140  | 0.373        | 0.119        | 0.632        | 0.014, .179  | 0.391        | 0.312        | 0.981        | 0.008, .157  | 0.002, .115  | 0.314        |
| Regularly use implants          | 0.031, .120  | 0.009, .227  | 0.213        | 0.037, .110  | 0.117        | 0.011, .138  | 0.249        | 0.165        | <0.001, .209 | <0.001, .198 | 0.053        |
| Approach if stop laying         | 0.064        | 0.334        | 0.211        | 0.816        | 0.087        | 0.387        | 0.038, .066  | 0.367        | <0.001, .128 | <0.001, .137 | <0.001, .081 |
| In will?                        | <0.001, .106 | 0.043, .054  | 0.001, .088  | 0.074        | 0.108        | <0.001, .113 | <0.001, .078 | 0.001, .084  | <0.001, .115 | 0.001, .074  | <0.001, .128 |
| Daily feces removal from run?   | 0.015, .104  | 0.352        | 0.360        | 0.766        | 0.217        | 0.005, .107  | 0.358        | <0.001, .142 | <0.001, .145 | 0.005, .094  | <0.001, .166 |
| Heard of implant?               | <0.001, .211 | <0.001, .120 | 0.175        | 0.562        | 0.003, .110  | <0.001, .166 | 0.396        | 0.111        | <0.001, .222 | <0.001, .190 | <0.001, .100 |
| Cared for special needs?        | 0.005, .096  | 0.007, .077  | <0.001, .170 | 0.381        | 0.09         | 0.076        | 0.878        | 0.226        | <0.001, .188 | <0.001, .162 | <0.001, .158 |
| Able to select closest chicken? | <0.001, .187 | <0.001, .110 | 0.018, .083  | 0.244        | <0.001, .132 | 0.003, .095  | 0.933        | 0.338        | <0.001, .148 | <0.001, .113 | <0.001, .174 |
| No. of chickens                 | 0.180        | 0.936        | <0.001, .115 | <0.001, .120 | 0.003, .093  | 0.179        | <0.001, .166 | 0.013, .073  | 0.069        | 0.288        | 0.006, .091  |
| How long caring                 | <0.001, .171 | 0.032, .069  | 0.398        | 0.014, .071  | <0.001, .115 | <0.001, .094 | <0.001, .108 | 0.926        | 0.153        | 0.635        | 0.017, .071  |
| Stage of life                   | 0.002, .078  | 0.576        | <0.001, .174 | 0.017, .064  | <0.001, .098 | <0.001, .076 | <0.001, .075 | 0.026, .065  | <0.001, .120 | <0.001, .089 | <0.001, .207 |
| Frequency coop feces removal    | 0.017, .067  | 0.117        | <0.001, .145 | 0.041, .073  | 0.726        | <0.001, .083 | 0.159        | 0.074        | <0.001, .101 | <0.001, .098 | <0.001, .110 |
| Run size                        | 0.001, .089  | 0.147        | 0.408        | <0.001, .106 | <0.001, .106 | <0.001, .099 | <0.001, .182 | 0.367        | 0.381        | 0.672        | 0.163        |

Table S3. Contingency table comparing method of acquiring chickens and country of residence.

|                                                                                               | What country do you live in most of the time? |        |           |             |      |               |                          |       | Total |
|-----------------------------------------------------------------------------------------------|-----------------------------------------------|--------|-----------|-------------|------|---------------|--------------------------|-------|-------|
|                                                                                               | USA                                           | Canada | Australia | New Zealand | UK   | An EU country | Another European country | Other |       |
| The chickens in my care came from a hatchery                                                  | 14                                            | 0      | 0         | 0           | 17   | 1             | 0                        | 0     | 32    |
| The chickens in my care came from a local breeder                                             | 6                                             | 1      | 1         | 1           | 494  | 8             | 1                        | 3     | 515   |
| I bred and reared the chickens in my care                                                     | 4                                             | 0      | 2         | 0           | 99   | 6             | 0                        | 2     | 113   |
| The chickens in my care are ex-commercial chickens spared from slaughter                      | 6                                             | 0      | 0         | 1           | 1222 | 6             | 1                        | 4     | 1240  |
| The chickens in my care are unwanted chickens from school hatching projects                   | 0                                             | 0      | 0         | 0           | 10   | 0             | 1                        | 0     | 11    |
| The chickens in my care are unwanted chickens of neighbors or friends or from animal shelters | 12                                            | 0      | 0         | 0           | 64   | 2             | 0                        | 0     | 78    |
| Other                                                                                         | 4                                             | 2      | 0         | 0           | 48   | 1             | 0                        | 1     | 56    |
| Total                                                                                         | 46                                            | 3      | 3         | 2           | 1954 | 24            | 3                        | 10    | 2045  |

Table S4. Contingency table comparing method of acquiring chickens with role name.

|                                                                                               | Which of the following terms do you think best describes your chicken-caring role? |               |                |                 |       | Total |
|-----------------------------------------------------------------------------------------------|------------------------------------------------------------------------------------|---------------|----------------|-----------------|-------|-------|
|                                                                                               | Chicken rescuer                                                                    | Chicken carer | Chicken keeper | Backyard farmer | Other |       |
| The chickens in my care came from a hatchery                                                  | 0                                                                                  | 10            | 16             | 5               | 2     | 33    |
| The chickens in my care came from a local breeder                                             | 4                                                                                  | 195           | 282            | 27              | 10    | 518   |
| I bred and reared the chickens in my care                                                     | 3                                                                                  | 30            | 67             | 7               | 7     | 114   |
| The chickens in my care are ex-commercial chickens spared from slaughter                      | 408                                                                                | 457           | 337            | 21              | 19    | 1242  |
| The chickens in my care are unwanted chickens from school hatching projects                   | 5                                                                                  | 2             | 4              | 0               | 0     | 11    |
| The chickens in my care are unwanted chickens of neighbors or friends or from animal shelters | 13                                                                                 | 37            | 25             | 2               | 1     | 78    |
| Other                                                                                         | 2                                                                                  | 20            | 30             | 1               | 3     | 56    |
| Total                                                                                         | 435                                                                                | 751           | 761            | 63              | 42    | 2052  |

Table S5. Contingency table comparing specific chicken sex cared for with country of residence.

|                                          | What country do you live in most of the time? |        |           |             |      |               |                          |       | Total |
|------------------------------------------|-----------------------------------------------|--------|-----------|-------------|------|---------------|--------------------------|-------|-------|
|                                          | USA                                           | Canada | Australia | New Zealand | UK   | An EU country | Another European country | Other |       |
| I care for hens                          | 17                                            | 1      | 1         | 2           | 1604 | 13            | 1                        | 6     | 1645  |
| I care for roosters/ cocks               | 0                                             | 0      | 0         | 0           | 2    | 0             | 1                        | 0     | 3     |
| I care for both hens and roosters/ cocks | 28                                            | 1      | 2         | 0           | 342  | 10            | 1                        | 4     | 388   |
| Total                                    | 45                                            | 2      | 3         | 2           | 1948 | 23            | 3                        | 10    | 2036  |

Table S6. Contingency table comparing use of implants with gender.

|                                                                        | Please select the gender you identify most with |      |            |                | Total |
|------------------------------------------------------------------------|-------------------------------------------------|------|------------|----------------|-------|
|                                                                        | Female                                          | Male | Non-binary | Rather not say |       |
| Use implants for all hens in a preventative capacity                   | 11                                              | 3    | 0          | 0              | 14    |
| Use implants for all hens in a treatment capacity (only if become ill) | 100                                             | 13   | 1          | 0              | 114   |
| No                                                                     | 467                                             | 23   | 0          | 7              | 497   |
| Other                                                                  | 26                                              | 1    | 0          | 0              | 27    |
| Not applicable - I only care for roosters/cocks                        | 0                                               | 0    | 0          | 1              | 1     |
| Total                                                                  | 604                                             | 40   | 1          | 8              | 653   |

Table S7. Contingency table comparing use of implants with diet group.

|                                                                        | Diet Grouped |             |                   |       | Total |
|------------------------------------------------------------------------|--------------|-------------|-------------------|-------|-------|
|                                                                        | Omni-vore    | Vege-tarian | Plant-based/vegan | Other |       |
| Use implants for all hens in a preventative capacity                   | 4            | 1           | 9                 | 0     | 14    |
| Use implants for all hens in a treatment capacity (only if become ill) | 68           | 30          | 14                | 2     | 114   |
| No                                                                     | 349          | 107         | 32                | 8     | 496   |
| Other                                                                  | 12           | 7           | 7                 | 1     | 27    |
| Not applicable - I only care for roosters/cocks                        | 0            | 0           | 1                 | 0     | 1     |
| Total                                                                  | 433          | 145         | 63                | 11    | 652   |

Table S8. Contingency table comparing awareness of implant and age group.

|                                                                             |     | Please select your age group. |       |       |       |       |       |     | Total |
|-----------------------------------------------------------------------------|-----|-------------------------------|-------|-------|-------|-------|-------|-----|-------|
|                                                                             |     | 18-24                         | 25-34 | 35-44 | 45-54 | 55-64 | 65-74 | 75+ |       |
| Have you heard of the Suprelorin hormonal implant that can be used in hens? | Yes | 5                             | 85    | 127   | 207   | 172   | 54    | 4   | 654   |
|                                                                             | No  | 10                            | 71    | 175   | 411   | 444   | 241   | 38  | 1390  |
| Total                                                                       |     | 15                            | 156   | 302   | 618   | 616   | 295   | 42  | 2044  |

Table S9. Contingency table comparing awareness of implant with diet group.

|                                                                             |     | Diet Grouped |            |                   |       | Total |
|-----------------------------------------------------------------------------|-----|--------------|------------|-------------------|-------|-------|
|                                                                             |     | Omnivore     | Vegetarian | Plant-based/vegan | Other |       |
| Have you heard of the Suprelorin hormonal implant that can be used in hens? | Yes | 435          | 145        | 63                | 11    | 654   |
|                                                                             | No  | 1125         | 214        | 34                | 15    | 1388  |
| Total                                                                       |     | 1560         | 359        | 97                | 26    | 2042  |

Table S10. Novel care-taking practices.

Note: Tallies of qualitative categories of responses are provided regarding any novel care-taking practices respondents felt deserved more attention or research.

\*The authors are merely reporting the respondents' comments. The authors recommend consultation with an exotic/avian vet before attempting any novel treatment with chickens. There is no evidence (beyond anecdotal) of the safety of this treatment option and the authors do not recommend its use.

\*\*This is illegal in the UK though legal in many countries such as across the EU [76].

| Category      | Subcategory                                                                                                                                                                               | Tally | Total |
|---------------|-------------------------------------------------------------------------------------------------------------------------------------------------------------------------------------------|-------|-------|
| Home remedies | Adding apple cider vinegar and garlic to water                                                                                                                                            | 20    | 41    |
|               | Herbal remedies to avoid medications (e.g., St John's Wort, oregano oil, turmeric, kefir, seaweed)                                                                                        | 13    |       |
|               | Aspirin for circulation or pain relief*                                                                                                                                                   | 3     |       |
|               | Brandy to treat sour crop*                                                                                                                                                                | 2     |       |
|               | Wine (for improved eggs)*                                                                                                                                                                 | 1     |       |
|               | Cannabis oil                                                                                                                                                                              | 1     |       |
|               | Nystatin cream for vent gleet                                                                                                                                                             | 1     |       |
| Other         | More space/enrichment (music/radio, hanging veg, bottles with holes for corn pecking, particular concern for free-range ex-commercial hens being kept in small runs, more shrubs in run). | 28    | 119   |
|               | Interact more with chickens/chicken training                                                                                                                                              | 28    |       |
|               | Red mite avoidance (optimizing use of DE, Elanco/Elector, (unpermitted) use of Frontline intended for dogs/cats*)                                                                         | 23    |       |
|               | Feed eggs back to them                                                                                                                                                                    | 5     |       |
|               | Hen integration (keep separate for weeks, then introduce at night)                                                                                                                        | 5     |       |
|               | Use of vets                                                                                                                                                                               | 3     |       |
|               | Chicken trolley, wheelchair, hammock, saddle                                                                                                                                              | 3     |       |
|               | Bathe chickens                                                                                                                                                                            | 3     |       |
|               | Regular poo picking of run                                                                                                                                                                | 2     |       |
|               | Do worm counts vs deworming                                                                                                                                                               | 2     |       |
|               | Treadle feeders                                                                                                                                                                           | 2     |       |
|               | DIY crop feeding to ill chickens                                                                                                                                                          | 2     |       |
|               | Deep litter method                                                                                                                                                                        | 2     |       |
|               | Use heat in coop                                                                                                                                                                          | 2     |       |
|               | Chicken massage/physio                                                                                                                                                                    | 1     |       |
|               | Treat crop issues with digestive enzyme                                                                                                                                                   | 1     |       |
|               | Rooster chemical caponization**                                                                                                                                                           | 1     |       |
|               | Take on trips/use leash                                                                                                                                                                   | 1     |       |
|               | Llamas as lookout animals                                                                                                                                                                 | 1     |       |
|               | Create soft landing areas from perches for heavier chickens (joints)                                                                                                                      | 1     |       |
|               | 2-run system and alternate to reduce disease                                                                                                                                              | 1     |       |
|               | Chicken insurance                                                                                                                                                                         | 1     |       |
|               | Conduct health checks                                                                                                                                                                     | 1     |       |



Table S11. How can non-commercial chicken welfare be further optimized?

Note: Categories of qualitative responses are provided regarding how non-commercial chicken welfare could be further optimized (n=1,644). Respondents frequently stated multiple factors; hence the total responses exceed the number of respondents.

| Category        | Subcategory                                                   | Tally | Total |
|-----------------|---------------------------------------------------------------|-------|-------|
| Vets care       | Better vet care                                               | 109   | 232   |
|                 | Local avian vet                                               | 58    |       |
|                 | Reduce cost of vets/funding for costs/subsidized costs        | 32    |       |
|                 | Funding for implants                                          | 14    |       |
|                 | Better vet ethics                                             | 7     |       |
|                 | Mobile avian vet                                              | 6     |       |
|                 | More meds licensed for chickens                               | 3     |       |
|                 | Over-the-counter meds for chickens                            | 3     |       |
| Living quarters | More space (coop, run, free-range time)                       | 511   | 921   |
|                 | Effective predator protection/deterrent for secure large area | 193   |       |
|                 | Environmental enrichment                                      | 52    |       |
|                 | Improved equipment                                            | 50    |       |
|                 | More grass/plants/greenery                                    | 40    |       |
|                 | More shelter (shade, rain)                                    | 31    |       |
|                 | More varied space                                             | 26    |       |
|                 | Use plastic coop                                              | 10    |       |
|                 | Closer to home                                                | 3     |       |
|                 | Sun in winter                                                 | 2     |       |
|                 | Better run substrate                                          | 1     |       |
|                 | Less mud                                                      | 1     |       |
|                 | Persuade 12 rescued together to not sleep in same coop        | 1     |       |
|                 |                                                               |       |       |
| Care            | Spend more time, give more attention/energy                   | 40    | 161   |
|                 | Prepare for future avian flu lockdowns                        | 22    |       |
|                 | Climate control (cool in Summer and warm in winter)           | 21    |       |
|                 | More regular cleaning                                         | 20    |       |
|                 | Improve diet (e.g., organic)                                  | 12    |       |
|                 | Give probiotics/supplements                                   | 10    |       |
|                 | Improve worming consistency/do count/make easier              | 7     |       |
|                 | Allow chickens inside human home more                         | 7     |       |
|                 | More treats                                                   | 5     |       |
|                 | Let out earlier in Summer/use automatic door                  | 5     |       |
|                 | More health checks                                            | 5     |       |
|                 | Teach/train                                                   | 3     |       |
|                 | Don't allow inside human home                                 | 2     |       |
|                 | Trips to new areas                                            | 1     |       |
|                 | Difficulty identifying "problem" hen                          | 1     |       |
| General         | Rescuing/having more chickens                                 | 19    | 52    |
|                 | Eliminate red mite/parasites                                  | 14    |       |
|                 | Rat control                                                   | 8     |       |
|                 | Few cats stalking chickens                                    | 4     |       |
|                 | No bullying/fighting                                          | 4     |       |
|                 | Rescuing/having fewer chickens                                | 2     |       |

|                 |                                                                                      |     |     |
|-----------------|--------------------------------------------------------------------------------------|-----|-----|
|                 | Tamer chickens                                                                       | 1   |     |
|                 | Acquire more knowledge/training courses/education of owners                          | 102 |     |
|                 | Ban intensive farming in cages and barns                                             | 52  |     |
|                 | Funding for setup                                                                    | 18  |     |
|                 | Less breeding for maximum egg production                                             | 15  |     |
|                 | More awareness of ex-commercial hen health issues, vet costs, and space requirements | 12  |     |
|                 | Attitudes/legislation to shift so status similar to cats/dogs                        | 12  |     |
|                 | Permit roosters                                                                      | 12  |     |
|                 | Stop eating chickens and hens' eggs                                                  | 7   |     |
|                 | Increase public awareness about welfare costs of cheap meat/eggs                     | 7   |     |
| Broader society | Stop chicken lockdown/develop vaccine                                                | 6   | 266 |
|                 | Chicken pet insurance                                                                | 5   |     |
|                 | Defra - change attitude towards backyard carers: "we're not farmers"                 | 4   |     |
|                 | Welfare inspections / state some BY practices as illegal                             | 3   |     |
|                 | More chicken sitters                                                                 | 3   |     |
|                 | Improve representation on TV/in pet shops                                            | 2   |     |
|                 | Ban school hatching projects                                                         | 1   |     |
|                 | Promote capon                                                                        | 1   |     |
|                 | Sex-testing to avoid males                                                           | 1   |     |
|                 | Compulsory registration                                                              | 1   |     |
|                 | Runs/coops on the market are too small for stated number                             | 1   |     |
|                 | Fewer neighbor worries in terms of noise                                             | 1   |     |
|                 |                                                                                      |     |     |
|                 |                                                                                      |     |     |
| Other           | Believes already have high (enough) welfare: nothing further needed                  | 209 | 209 |

Table S12. What support would aid chicken welfare?

Note: Categories of qualitative responses are provided regarding what support would aid the enhanced welfare discussed in Table C11.

| Category                 | Subcategory                                                                                                            | Tally | Total |
|--------------------------|------------------------------------------------------------------------------------------------------------------------|-------|-------|
| Vets                     | Knowledgeable avian vets available locally                                                                             | 501   | 663   |
|                          | Cheaper vets                                                                                                           | 85    |       |
|                          | Vets' attitudes to chickens to be similar to cats and dog                                                              | 23    |       |
|                          | Online/phone vet consultations                                                                                         | 20    |       |
|                          | Mobile avian vet                                                                                                       | 12    |       |
|                          | More licensed drugs for chickens                                                                                       | 8     |       |
|                          | Access to vaccines for small flocks                                                                                    | 6     |       |
|                          | Lower cost of implant                                                                                                  | 6     |       |
|                          | 24/7 avian vet                                                                                                         | 1     |       |
|                          | Easier access to post-mortems                                                                                          | 1     |       |
|                          |                                                                                                                        |       |       |
| Other specialist support | Local specialists/experienced carers – courses, workshops, network                                                     | 94    | 289   |
|                          | More specialist online resources                                                                                       | 47    |       |
|                          | More official literature and non-contradicting information                                                             | 34    |       |
|                          | More official research into optimal chicken welfare/health                                                             | 25    |       |
|                          | More experienced chicken sitters/hotels/respite carers                                                                 | 21    |       |
|                          | More information at the start                                                                                          | 13    |       |
|                          | Pet chicken insurance                                                                                                  | 9     |       |
|                          | Tailored support for rescued/disabled chickens                                                                         | 8     |       |
|                          | Helpline                                                                                                               | 6     |       |
|                          | Wider awareness of implants                                                                                            | 5     |       |
|                          | Inspections/welfare visits/vetting                                                                                     | 5     |       |
|                          | More on rooster care                                                                                                   | 3     |       |
|                          | Euthanasia method without vets                                                                                         | 3     |       |
|                          | Research into natural/home remedies                                                                                    | 3     |       |
|                          | Vegan care resources                                                                                                   | 3     |       |
|                          | More discussion of chicken deaths                                                                                      | 3     |       |
|                          | Wider awareness of chicken diaper and mat-training chickens                                                            | 2     |       |
|                          | Campaigns to prevent certain practices such as bathing chickens and tipping chickens upside down to remove crop liquid | 2     |       |
|                          | Improved Defra bird flu updates                                                                                        | 1     |       |
|                          | More effective hormone blocker                                                                                         | 1     |       |
|                          | Research regarding selecting for quieter rooster crow or from later time                                               | 1     |       |
| General                  | More time/money                                                                                                        | 31    | 150   |
|                          | Improved predator deterrents/protection                                                                                | 17    |       |
|                          | Wider availability of chicken feed and equipment                                                                       | 15    |       |
|                          | Educating the public about chicken capacities/sentience/role as pets                                                   | 12    |       |
|                          | Council support                                                                                                        | 11    |       |
|                          | Over-the-counter meds                                                                                                  | 10    |       |
|                          | Help from others (family/friends)                                                                                      | 8     |       |
|                          | Subsidies for rescued chickens                                                                                         | 7     |       |
|                          | Better chicken products on the market                                                                                  | 7     |       |
|                          | More enrichment ideas                                                                                                  | 6     |       |
|                          | More effort from me                                                                                                    | 6     |       |
|                          | End all anti-chicken zoning laws                                                                                       | 5     |       |

|       |                                                         |     |   |
|-------|---------------------------------------------------------|-----|---|
|       | Encourage urban chicken keeping                         | 2   |   |
|       | Legal recognition of chickens as pets vs farmed animals | 2   |   |
|       | Ban intensive farming/breeding for maximum egg yield    | 2   |   |
|       | Better carer health                                     | 2   |   |
|       | More diverse feed for chickens other than just pellets  | 2   |   |
|       | Climate-control in coops                                | 1   |   |
|       | Chicken-specific rescue centers akin to Battersea       | 1   |   |
|       | No avian flu lockdown                                   | 1   |   |
|       | Humane rat control                                      | 1   |   |
|       | Compulsory registration                                 | 1   |   |
| Other | Already sufficient support available                    | 60  | X |
|       | Same as previous Q                                      | 26  |   |
|       | Not sure                                                | 126 |   |
|       | None – don't need/want help                             | 192 |   |

Table S13. Qualitative responses to “any other comments.”

| Category                | Subcategory                                                                                          | Tally | Total |
|-------------------------|------------------------------------------------------------------------------------------------------|-------|-------|
| Chickens' role          | Pleasure/rewarding/satisfying                                                                        | 139   | 280   |
|                         | They are wonderful! / I love them!                                                                   | 53    |       |
|                         | Great pets / more recognition as pets                                                                | 35    |       |
|                         | Great therapy                                                                                        | 24    |       |
|                         | Useful                                                                                               | 12    |       |
|                         | Part of family                                                                                       | 8     |       |
|                         | Livestock, not pets                                                                                  | 4     |       |
|                         | Not playthings                                                                                       | 3     |       |
|                         | A kind of subpet                                                                                     | 2     |       |
| Care-taking thoughts    | Massive expense/commitment                                                                           | 50    | 89    |
|                         | It is stressful/sad when they are ill/die                                                            | 21    |       |
|                         | Easy                                                                                                 | 11    |       |
|                         | Introducing new hens is traumatic                                                                    | 3     |       |
|                         | Red mite is a nightmare                                                                              | 2     |       |
|                         | Different ways to care for birds                                                                     | 2     |       |
| Chicken characteristics | Unique/best personalities                                                                            | 43    | 108   |
|                         | Friendly/intelligent/sentient                                                                        | 42    |       |
|                         | Interactive/show affection in own way                                                                | 23    |       |
| Health                  | Improved vet care                                                                                    | 29    | 39    |
|                         | Love cuddle/lap time                                                                                 | 7     |       |
|                         | Vets ASAP after going quiet                                                                          | 3     |       |
| Carer recommendations   | Watch and spend time with them                                                                       | 21    | 107   |
|                         | Encourage everyone to rescue ex-commercial chickens                                                  | 18    |       |
|                         | Read as much as you can                                                                              | 12    |       |
|                         | Allow laying breaks                                                                                  | 9     |       |
|                         | Enrichment                                                                                           | 9     |       |
|                         | Ensure have shelter – shade and for storms                                                           | 7     |       |
|                         | Terrible for garden                                                                                  | 6     |       |
|                         | Great for garden                                                                                     | 5     |       |
|                         | De-poop run regularly                                                                                | 3     |       |
|                         | BHWT resources                                                                                       | 3     |       |
|                         | PoultryForum                                                                                         | 3     |       |
|                         | Handy Hen Facebook group                                                                             | 2     |       |
|                         | Natural environments                                                                                 | 2     |       |
|                         | Ensure none of your garden plants will kill them                                                     | 2     |       |
|                         | Paddling pool in heat                                                                                | 1     |       |
|                         | Wood ash to bedding (red mite)                                                                       | 1     |       |
|                         | Clear up feed spills                                                                                 | 1     |       |
|                         | Fencing type to avoid flying and landing on it                                                       | 1     |       |
|                         | Avoid named veterinary practice                                                                      | 1     |       |
|                         | Small spaces should be discouraged – space to roam is required                                       | 43    |       |
|                         | More education required regarding chickens' needs at all life stages and of their benefits to humans | 16    |       |
|                         | Encourage more to do it to reduce commercial demand                                                  | 13    |       |
|                         | Increase awareness of commercial welfare abuses                                                      | 12    |       |
|                         | Improvements re fox protection                                                                       | 11    |       |

|                          |                                                                               |    |     |
|--------------------------|-------------------------------------------------------------------------------|----|-----|
| Societal recommendations | Greater tolerance of roosters                                                 | 10 | 168 |
|                          | Legislation to protect their rights from human harm                           | 9  |     |
|                          | Rehoming charities could give a better start-up care package and vet adopters | 8  |     |
|                          | More proactive council support                                                | 7  |     |
|                          | Chicken welfare carers' own responsibility                                    | 6  |     |
|                          | Stop breeding for maximum egg yield                                           | 4  |     |
|                          | Separate legislation to commercial chickens                                   | 4  |     |
|                          | Backyard chickens contribute to poor welfare too                              | 4  |     |
|                          | Compulsory Defra registration                                                 | 4  |     |
|                          | Chicken licenses and inspections                                              | 3  |     |
|                          | Ban school hatching projects                                                  | 3  |     |
|                          | Breeders should be regulated just like cat/dog breeders                       | 2  |     |
|                          | More advice required                                                          | 2  |     |
|                          | Make vaccines available for small flocks                                      | 2  |     |
|                          | More chicken sitters                                                          | 2  |     |
|                          | Track where end up                                                            | 1  |     |
|                          | Cheaper materials                                                             | 1  |     |
|                          | Relax renting rules                                                           | 1  |     |
| Information              | Spend time undoing harm from farm life                                        | 18 | 42  |
|                          | Rescues have greater needs than POL hens                                      | 5  |     |
|                          | Closer with neighbors                                                         | 5  |     |
|                          | Conflict with neighbors                                                       | 4  |     |
|                          | Roosters help hens                                                            | 3  |     |
|                          | So much more information available with onset of Internet than 40 years ago   | 2  |     |
|                          | Roosters disadvantage hens                                                    | 1  |     |
|                          | Chickens mourn their mates                                                    | 1  |     |
|                          | Can take years to get the right setup                                         | 1  |     |
|                          | Had influence on neighbors' egg-buying habits                                 | 1  |     |
|                          | Better relationship with rescues                                              | 1  |     |
| Children                 | Great for child education – animal welfare/husbandry                          | 9  | 11  |
|                          | Can be intimidating for young kids                                            | 2  |     |
| Concerns                 | New owners should do more research before adopting/acquiring                  | 21 | 37  |
|                          | Forum content                                                                 | 6  |     |
|                          | Rats                                                                          | 4  |     |
|                          | Allotment concerns (distance)                                                 | 1  |     |
|                          | Appeared less happy in lockdown                                               | 1  |     |
|                          | Unhappy chickens in lockdown minor consideration vs human lives               | 1  |     |
|                          | Brexit, pandemic, food shortage leading to increase of thoughtless owners     | 1  |     |
|                          | Cannibalism if given cat food?                                                | 1  |     |
|                          | Chicken jumper bad                                                            | 1  |     |
| Miscellaneous            | Other                                                                         | 9  | 45  |
|                          | Thank you for survey                                                          | 7  |     |
|                          | Give them a life worth living                                                 | 5  |     |
|                          | Dislike "backyard" term                                                       | 4  |     |
|                          | Don't anthropomorphize                                                        | 4  |     |

|                                                              |     |
|--------------------------------------------------------------|-----|
| Worry about feed sustainability                              | 3   |
| Addictive                                                    | 2   |
| Wish could move elsewhere to do more                         | 2   |
| Not meant to be vegetarian                                   | 2   |
| Sounds liberal agenda/don't turn political/strange questions | 2   |
| Seemed less complicated 30 years ago                         | 1   |
| Ours are like in Chicken Run                                 | 1   |
| I volunteer                                                  | 1   |
| Lone chicken attached to dog/toy                             | 1   |
| Don't understand lockdown logic                              | 1   |
| N/A or No                                                    | 241 |

## Supplementary Materials D. Discussion of results that supplement extant literature

### Demographics

In terms of demographics, there seems to be relative consistency in non-commercial chicken carers' demographics. For instance, the most common flock size in this study of 3-6 chickens echoes averages of 3-5 found by Karabozhilova et al. [21] and Souvestre et al. [18], and under 10 by Elkhoraibi et al. [24]. Female chicken carers also vastly outweigh males: 86.9% versus 11.8% in this study, which mirrors similar imbalances in studies by Karabozhilova et al. [21], Elkhoraibi et al. [24], and Souvestre et al. [18]. Non-commercial chicken carers tended to live rurally in detached homes with large gardens, though this is diversifying, echoing the findings of Elkhoraibi et al. [24]. Middle-aged, married (with or without children) and high education levels were common demographic factors in this study and echoed by Elkhoraibi et al. [24], though this may be diversifying as well because Souvestre et al. [18] found 30-49 to be the most highly represented age group and an urban-based survey found the most common age group to be 25-40 [21].

Similar to other surveys, this survey had a low response rate from ethnic minorities. Whilst this can be partially explained by lower numbers of non-white ethnicities in the UK (the predominant country of residence for the vast majority of respondents in this survey), it may also be partially explained by the resources required to participate in surveys (e.g., time, internet, laptop, English skills), cultural norms, and a lower proportion of ethnic minorities living in rural areas, where non-commercial chicken keeping still dominates, despite diversification into non-rural areas. More research is warranted regarding chicken keeping in ethnic minority circles. Rehoming charities could also diversify their promotions to aid representation of ethnic minorities.

### Chickens as pets and vet care for chickens

There are two key findings from this study that reinforce knowledge from extant literature: 1) the increasing number of non-commercial chicken carers who view their chickens as unkillable/inedible/a pet, and 2) a need for more avian-experienced and affordable vet care. These shall now be addressed in turn.

Firstly, 93.6% of respondents stated they did not, and would never, kill their chickens for human consumption (nor have someone do it for them). Moreover, 68.8% believed it to be morally unacceptable to breed chickens for maximum egg production, and over three quarters (76.3%) did not consider chickens to be morally less important than dogs. These are all traits commonly associated with pets/companion animals and with being higher on the sociozoologic ladder described by Arluke and Sanders [29]. When considering 68.8% of respondents finding it unacceptable to breed chickens for maximum egg production, there is comparable support amongst the public for bans on selective breeding with dogs who experience considerable health issues [77]. Moreover, whilst of the 10 possible motives provided, pet/companionship was not one of the motives offered in this study, the primary "other" options given in response to this motive question were "pet" or "companion." These results mirror high percentages of



chicken owners from other studies who view their chickens as pets: 53% and 57% in the studies by Souvestre et al. [18] and Elkhoraibi et al. [24], respectively, and 72% and 73% in the studies by Pohjola et al. [25] and Karabozhilova et al. [21], respectively. Some of the wording differed in the questionnaires such as that by Pohjola et al. [25] including “hobby, companion, pet” together as one motivation. This may explain the different ranges. More consistent wording in future survey research is required for more fruitful comparisons. Additionally, sample sizes were 30 [21], 178 [25], 1,160 [18], and 1,487 [24]; this variation may likewise explain some of the wide ranges in results. See section 4.3 for discussion of chicken rescue as a motive.

Secondly, the present study found 36.2% of all respondents did not use a vet. Of these, almost three quarters (74.0%) did attempt to treat their chickens at home though, and the top reason for this was a fear that vets would not know how to treat their chicken or just suggest euthanasia (selected by 55.1% of home treaters). The second most common reason selected was vets are too expensive (chosen by 45.3% of home treaters). Moreover, “improved vet care” was the third most commonly reported qualitative answer when respondents were asked how welfare could be further optimized and “knowledgeable avian vets available locally” was the top answer cited (n=501) when respondents were asked what could support them in optimizing welfare further. An urgent need for more avian knowledge amongst vets has also been reported by others such as Davies [40], Singleton et al. [19], and Kodilinye-Sims and Royden [78]. The fact that so many undiagnosed or non-specific symptoms have been identified in veterinary records for chickens provides further evidence for this lack of knowledge [27]. Similarly, in the present study, “unknown cause” was the most frequently selected answer option for cause of death, followed by “sudden death,” suggesting there are big gaps in knowledge regarding chicken care and treatment. It would be useful to promote post-mortem services more to clients and for vets/universities to even subsidize the cost as post-mortems can help to advance knowledge. Akin to Elkhoraibi et al.’s [24] study that found only 8.8% had ever used necropsy services, in this study only 10.2% used such services either sometimes, often, or always.

Nevertheless, some potential improvements regarding veterinary care for chickens were also detected in the present study. For instance, the number of people *not* using a vet for chicken care may possibly be decreasing as the figure was up to 50% in Karabozhilova et al.’s [21] study (versus 36.2% in this study). To the authors’ knowledge, the present study was the first survey-based study to distinguish between standard vet use and exotics vet use. This study found that 33.0% of those using a vet actually used an exotics vet. Whilst this could be higher, for a baseline result, this is a significant proportion of chicken carers. Further distinctions could be considered in future studies such as adding in the option of a non-exotics but still less officially avian-experienced vet, as 47.7% of those using a non-exotics vet stated that this was the reason why they did not use an exotics vet (i.e., they used a ‘chicken-friendly’ vet or a vet with some level of avian experience). Another example of potential improvements in veterinary care for chickens is that almost three quarters (73.6%) of respondents in the present study reported they were happy with the health/welfare service received at their vets; only 7.5% reported they were unhappy, with a further 18.9% stating they were unsure. This could suggest that, generally speaking, those with good chicken vets available to them do make use

of them and are mostly happy with the service.

### Further key welfare concerns

Alongside the lack of specialized veterinary care for chickens (discussed immediately above), there are some other key welfare concerns arising from this study that should be highlighted. These include: 1) higher reported incidences of and reasons for health concerns and deaths in the last year relative to extant literature, 2) welfare impacts arising from avian influenza lockdowns, 3) potentially inadequate spaces chickens are kept in, and 4) chicken killing methods – for the extreme minority that partake in killing their chickens. These will be addressed in turn.

First, 71.1% of respondents in the present study reported health conditions in their chickens in the last year, relative to only 41% in Elkhoraibi et al.'s [24] study – a 57.7% increase. Similarly, almost 70% (69.5%) reported 1+ deaths in the last year in the present study, relative to just 36% of respondents in Elkhoraibi et al.'s [24] study. Health condition prevalence and mortality in the last year were also reported as significantly lower in other studies too (e.g., [18]). The main reason for these apparent increases in health problems and deaths could be the high number of ex-commercial hens kept by the respondents in this study. This warrants further investigation. Ex-commercial chickens may require tailored care. It is potentially also an indictment of intensive animal farming – both living conditions and breeding regimens – if chickens adopted from such farms experience considerably worse welfare regarding regularity of health problems and likelihood of premature death.

This study reinforced external parasites (red mite) as the most common health condition, and found diarrhea among the top three health conditions reported, echoing Elkhoraibi et al. [24] and Pohjola et al. [25]. However, EYP emerged as the third most common health condition in the present study, which contrasts with former studies where prolapsed vent and sour crop were joint third. Nevertheless, Karabozhilova et al. [21] did also report an egg-related condition within the most commonly reported health conditions: egg binding. EYP reappears in our study as the fourth most common cause of death, preceded by unknown cause, sudden death and predation. In similar studies, cause of death has not commonly been reported in detail; however, predation was also a top cause of death in Elkhoraibi et al.'s [24] study.

Second, over 70% (71.0%) were worried about their chickens' welfare during the avian influenza "lockdown" restrictions in the winter of 2020-2021 in countries such as the UK (where the majority of respondents of the present study resided); 53.9% selected "yes" they were worried about the welfare of their chickens during avian flu restrictions, whilst 17.1% selected they were "sometimes" worried. In the open questions of this study, some respondents linked an increase in abnormal behavior – typically feather pecking – to the restrictions, even if owners had increased efforts with enrichment. As these restrictions are becoming more frequent [79], hopefully chicken carers are preparing better for further restrictions in future years, as some stated in the open questions of this study. However, for some it seems too resource-intensive in terms of time and cost. It should be made clear to prospective owners/rescuers that, come winter, these precautions will likely require adherence. As chickens descended from red junglefowl with roaming behavior as a highly

motivated behavior, it may be difficult for many (especially in urban areas) to cater for this need adequately under avian flu restrictions. This can lead to abnormal behaviors such as injurious pecking due to frustration and stress [80]. Other reasons for feather pecking could be inadequate procedures for introducing new chickens to a flock. In this study, over 30% stated they do not always introduce new hens gradually. Best practice is to keep new chickens separate but visible and introduce them slowly after several weeks of separation [81]. Some respondents also echoed concerns reported elsewhere [78] regarding some vets' refusals to treat chickens during avian influenza restrictions.

Third, there are several reasons to believe that many chickens at home may be kept in inadequate outdoor spaces (for indoor spaces, see section 4.3). These include: a) "more space" was mentioned most commonly (n=501) by those answering the qualitative question about how welfare could be further optimized; b) predation was the third most commonly reported cause of death (selected by 25.4%); c) few of the steps listed to minimize predation were selected by over 50% of respondents as being practiced; d) 34.1% stated they either only allow supervised free-range time (26.7%) or they never allow it at all (7.4%); and e) 56.0% of respondents deem temperatures -5°C (32°F) or colder as suitable as a minimum regular temperature for chickens. Hence, for a mixture of reasons surrounding enrichment of chickens' lives (providing positive behavioral opportunities), reducing behavioral problems, eradicating or minimizing predation risk, and keeping chickens at a comfortable temperature, chicken carers need to consider chickens' space requirements carefully. This is particularly concerning for chickens who may be rehomed either from an organic/genuinely free-ranging farm or a free-ranging home setup to confinement – even to a large run.

There is an argument to be made that the welfare enhancements to come from allowing chickens at home to free-roam outweigh the predation risk (in lower-risk areas), and that even if their lives are cut short, they have accrued so much welfare benefit, that it is justifiable to free-roam them – comparable to debates about cat free-roaming safety regarding potential car accidents. Nevertheless, the results of this study suggest there is considerable room for improvement in terms of minimizing predation risk. However, the third most commonly cited (n=50) response in the general open comments at the end of the study was the massive expense and time commitment that chicken care entails – often beyond people's expectations. Thus, these aspects should be emphasized to potential new carers more to avoid chickens being acquired on a whim and under false pretenses of caring for them being easy (indeed, only 29.9% selected "always" to the statement they are easy).

Also related to space issues, there is potentially a welfare risk from the use of just bare earth (selected by 41.1%) as the run substrate. This can lead to problems with mud during periods of high rainfall, especially in the winter. This can lead to increased disease risks so owners should be encouraged to add hard woodchips or another safe substrate to run floors. Finally, in this study, there was a 50:50 split between respondents removing chicken feces from the run on a daily basis, and those not doing so. Feces also increase disease risks; thus, owners should be encouraged to remove feces regularly.

Fourthly, a considerable 6.4% stated they (or someone on their behalf) kill their chickens for

human consumption. This is roughly half the percentage of respondents who stated they killed their chickens for meat in Elkhoraibi et al.'s [24] and Correia-Gomes and Sparks' [14] studies. This could be because of this study's particular focus on non-commercial chicken care (versus just small-scale) and especially on ex-commercial chicken carers. This study did not ask about other reasons for killing (e.g., due to illness or unwanted males); however, it was found that 98.8% of respondents would still look after hens in their care if they ceased laying eggs.

Of the 6.4% killing their chickens for consumption, cervical dislocation was the killing method selected by 57.3% of respondents, compared to decapitation by 11.5%, and killing cone (chicken is restrained upside down with the head extending through the narrow end of a cone-shaped device, allowing the neck to be clamped for dislocation) by 9.9%. A further 13.0% selected a mix of all stated methods and 8.4% selected "other," which predominantly comprised "broomstick method," captive bolt device, and mechanical dispatcher. A similar percentage of respondents used cervical dislocation in Correia-Gomes and Sparks' [14] study; however, in contrast, Elkhoraibi et al. [24] found the killing cone method to be the most common method utilized by respondents (34.1%). In this and other studies, respondents were not asked about stunning prior to attempts at killing; survey respondents should be asked explicitly about this in subsequent research to avoid assumptions as there are products available for stunning and awareness is being raised about them [82]. However, welfare concerns remain as backyard chicken keepers will likely be untrained in the proper use of both stunning and killing equipment. Stunning is also mentioned by a small proportion of respondents in the qualitative answers in this study. For private consumption purposes, it is not a legal requirement to stun chickens prior to using the cervical dislocation killing method in the UK and EU, though the Humane Slaughter Association recommends stunning beforehand [83], and it is illegal to decapitate chickens without prior stunning [84].

Relatedly, it is also concerning that amongst the qualitative responses, there was evidence of some chicken owners thinking that killing the chickens themselves is more humane than euthanasia by the vet. For some, this seems to align with the self-sufficiency and sovereignty ethos – one key motive for some chicken carers to keep chickens. The concern here is that owners are normally untrained, and there is no oversight. Attention should also be drawn to the fact that there is likely abuse of the term "euthanasia" amongst an extreme minority of non-commercial chicken owners. For instance, this is even evident amongst chicken scholars [17; p.280]. In this case, Zoubek [17] refers to the caring-killing paradox, which can be true for this minority of chicken owners. However, she then compares it to euthanasia in shelters of unwanted dogs. This comparison arguably fails as 1) dogs are not subsequently eaten, 2) such killing may actually be in some dogs' best interests as they may experience too poor levels of welfare if they reside in shelters very long term (true euthanasia requires that killing be in the individual's best interests), 3) it would be practiced by a vet, hence more likely to be humanely conducted (true euthanasia also requires that killing be humanely conducted). Increased availability of mobile avian-experienced vets would also remove concerns about stressful car journeys for chickens.
